# Supplementary material
Source: publisher figshare collection journal article supplement (https://gsajournals.figshare.com/ndownloader/files/31202158)
Supplement: Supplementary file 1 [file 31202158]

## Sheet: Sheet1
Experiment	Sample	Genotype	Description	Number of Cells	Run #	Tissue Location	Pigmentation status
RNA-seq	MC_WT1	MiniCoopR;mitfa:mCherry	WT labeled melanocytes	39000	1	Whole skin	Skin
RNA-seq	MC_WT2	MiniCoopR;mitfa:mCherry	WT labeled melanocytes	10000	1	Whole skin	Skin
RNA-seq	MC_WT3	MiniCoopR;mitfa:mCherry	WT labeled melanocytes	35000	1	Whole skin	Skin
RNA-seq	MC_Het1	BRAFV600E/+/p53+/lf/mitfa+/-/mitfa:mCherry	Heterozygous for BRAFV600E and p53lf with labeled melanocytes	19000	1	Whole skin	Skin
RNA-seq	MC_Het2	BRAFV600E/+/p53+/lf/mitfa+/-/mitfa:mCherry	Heterozygous for BRAFV600E and p53lf with labeled melanocytes	8000	1	Whole skin	Skin
RNA-seq	MC_Het3	BRAFV600E/+/p53+/lf/mitfa+/-/mitfa:mCherry	Heterozygous for BRAFV600E and p53lf with labeled melanocytes	16000	1	Whole skin	Skin
RNA-seq	MA1	BRAFV600E/p53lf/lf/crestin:EGFP	Homozygous for BRAFV600E and p53lf with labeled melanoma cells	100000	1	Dorsal, near fin	Unpigmented
RNA-seq	MA2	BRAFV600E/p53lf/lf/crestin:EGFP	Homozygous for BRAFV600E and p53lf with labeled melanoma cells	100000	1	Dorsal	Pigmented
RNA-seq	MA3A	BRAFV600E/p53lf/lf/crestin:EGFP	Homozygous for BRAFV600E and p53lf with labeled melanoma cells, fish 3 body tumor	100000	1	Dorsal	Pigmented
RNA-seq	MA3B	BRAFV600E/p53lf/lf/crestin:EGFP	Homozygous for BRAFV600E and p53lf with labeled melanoma cells, fish 3 tail tumor	100000	1	Tail	Unpigmented
RNA-seq	MA3C	BRAFV600E/p53lf/lf/crestin:EGFP	Homozygous for BRAFV600E and p53lf with labeled melanoma cells, fish 3 head tumor	43000	1	Head	Pigmented
ATAC-seq	MC_Het4	BRAFV600E/+/p53+/lf/mitfa+/-/mitfa:mCherry	Heterozygous for BRAFV600E and p53lf with labeled melanocytes	50000	2	Whole skin	Skin
ATAC-seq	MC_Het5	BRAFV600E/+/p53+/lf/mitfa+/-/mitfa:mCherry	Heterozygous for BRAFV600E and p53lf with labeled melanocytes	50000	2	Whole skin	Skin
ATAC-seq	MC_Het6	BRAFV600E/+/p53+/lf/mitfa+/-/mitfa:mCherry	Heterozygous for BRAFV600E and p53lf with labeled melanocytes	50000	2	Whole skin	Skin
ATAC-seq	MC_Homo	BRAFV600E/p53lf/lf/mitfa+/-/mitfa:mCherry	Homozygous for BRAFV600E and p53lf with labeled melanocytes	9311	2	Whole skin	Skin
ATAC-seq	MA4	BRAFV600E/p53lf/lf/crestin:EGFP	Homozygous for BRAFV600E and p53lf with labeled melanoma cells	50000	2	Head	Unpigmented
ATAC-seq	MA5	BRAFV600E/p53lf/lf/crestin:EGFP	Homozygous for BRAFV600E and p53lf with labeled melanoma cells	50000	2	Dorsal	Unpigmented
ATAC-seq	MA6	BRAFV600E/p53lf/lf/crestin:EGFP	Homozygous for BRAFV600E and p53lf with labeled melanoma cells	50000	3	Dorsal	Unpigmented
ATAC-seq	MA7	BRAFV600E/p53lf/lf/crestin:EGFP	Homozygous for BRAFV600E and p53lf with labeled melanoma cells	50000	3	Tail	Unpigmented
ATAC-seq	MA8	BRAFV600E/p53lf/lf/crestin:EGFP	Homozygous for BRAFV600E and p53lf with labeled melanoma cells	50000	3	Head	Unpigmented
ATAC-seq	MA9	BRAFV600E/p53lf/lf/crestin:EGFP	Homozygous for BRAFV600E and p53lf with labeled melanoma cells	50000	3	Tail	Pigmented
ATAC-seq	MA10	BRAFV600E/p53lf/lf/crestin:EGFP	Homozygous for BRAFV600E and p53lf with labeled melanoma cells	50000	3	Head	Pigmented
ATAC-seq	MA11	BRAFV600E/p53lf/lf/crestin:EGFP	Homozygous for BRAFV600E and p53lf with labeled melanoma cells	50000	3	Head	Pigmented
